# Supplementary material
Source: PubMed Central journal article supplement (PMC5501774)
Supplement: mmc1.pdf [file mmc1.pdf]

**Supplemental Data**

**Mutations in *ARMC9*, which Encodes a Basal Body Protein, Cause Joubert Syndrome in Humans and Ciliopathy Phenotypes in Zebrafish**

**Julie C. Van De Weghe, Tamara D.S. Rusterholz, Brooke Latour, Megan E. Grout, Kimberly A. Aldinger, Ranad Shaheen, Jennifer C. Dempsey, Sateesh Maddirevula, Yong-Han H. Cheng, Ian G. Phelps, Matthias Gesemann, Himanshu Goel, Ohad S. Birk, Talal Alanzi, Rifaat Rawashdeh, Arif O. Khan, University of Washington Center for Mendelian Genomics, Michael J. Bamshad, Deborah A. Nickerson, Stephan C.F. Neuhauss, William B. Dobyns, Fowzan S. Alkuraya, Ronald Roepman, Ruxandra Bachmann-Gagescu, and Dan Doherty**

## Supplementary Data

### Figure S1: zebrafish *armc9* gene structure and expression

**(A)** Schematic representation of the zebrafish *armc9* gene (with exonic/intronic structure) and protein below, showing the predicted LisH domain (green, N-terminal) and the armadillo-type-fold (ATF) domain (blue). **(B-K)** *In situ* hybridization on brain cryosections from adult zebrafish (**B-F** transverse sections, **G-K** sagittal sections). **(B)** Note staining along the ventricles marked with the arrows. **(C-E)** Higher magnification views of the boxed areas in **(B)**. **(C)** Ventral zone of periventricular hypothalamus *Hv*, **(D)** periventricular grey zone of optic tectum *PGZ*, **(E)** lateral division of valvula cerebelli *Val* and torus longitudinalis *TL*. **(F)** Absence of staining with the control sense probe. **(G)** Sagittal section through the brain and eye, showing signal in the cerebellum (boxed area **H**), the hypothalamus (boxed area **I**) and the optic tectum (boxed area **J**). *CCe* corpus cerebelli, *LCa* lobus caudalis cerebelli, *H* periventricular hypothalamus, *PGZ* periventricular grey zone of optic tectum, *TL* torus longitudinalis. **(K)** Absence of staining with the control sense probe. Scale bars: 200 $\mu$ m (B,F,G,K), 50 $\mu$ m (C-E), 100  $\mu$ m (H-J).

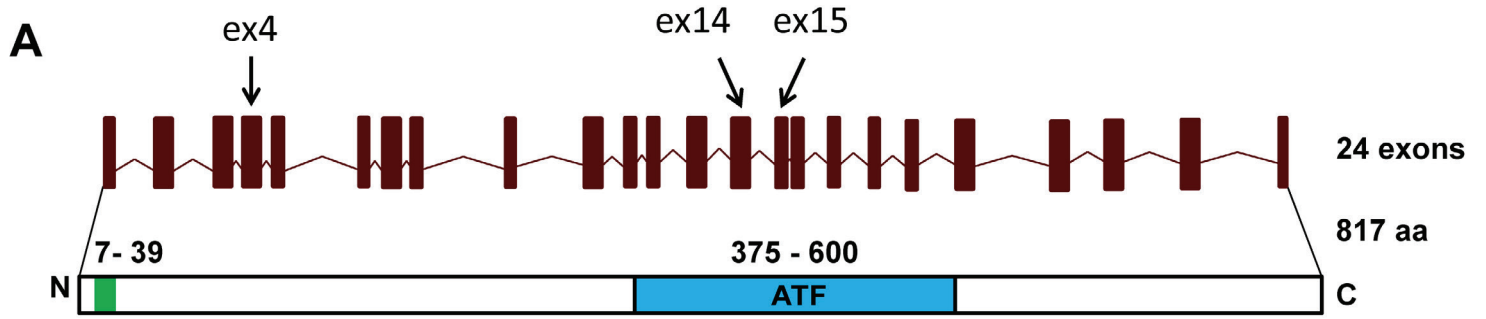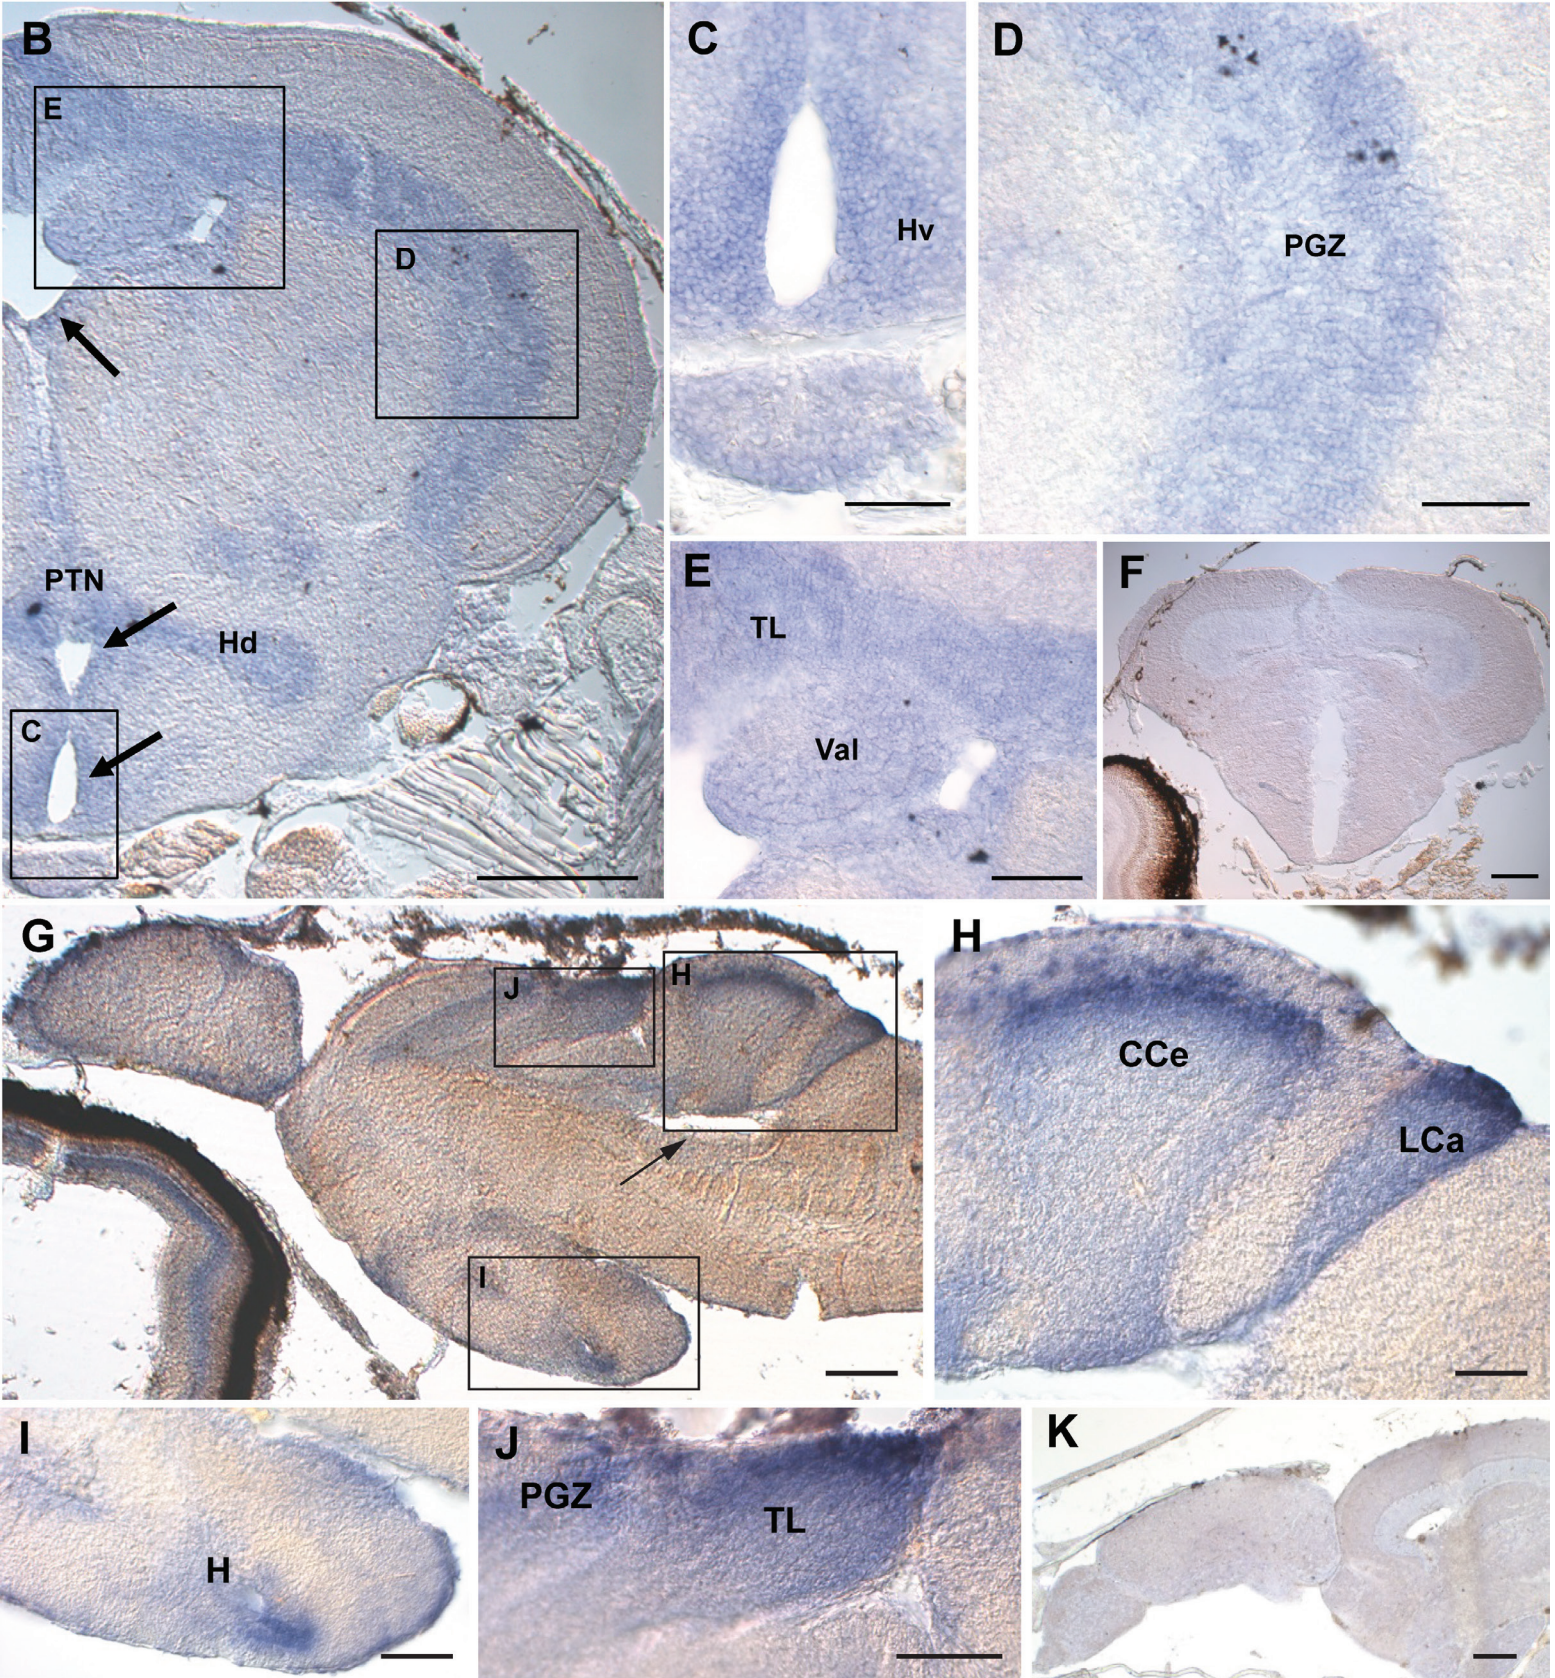

## Fig S2: CRISPR/Cas9 *armc9* mutants

**(A)** Representative gel showing PCR amplification around the CRISPR target sites on finclips from adult F0 animals with body curvature. Note the presence of bands in addition to the WT-sized band in the curved fish. The PCR product from animal #2 was cloned and sequenced, revealing that 9 of 9 selected clones had small out-of-frame indels, indicating that this animal had a very high rate of mutations in *armc9* despite a wild-type-sized band on the gel. **(B-C)** Scanning electron microscopy (SEM) overview images of dissected and halved brains from F0 *armc9* animals with body curvature. The arrow points to the ventricular surfaces shown in **(D-E)**. **(D-E)** Close up SEM images of the ventricular surface showing bundles of cilia in wild-type animals **(D)**. In contrast, *armc9* F0 mutant animals display a paucity of cilia **(E)**. **(F-I')** Immunohistochemistry on cryosections through whole eyes of wild-type **(F)** and an F0 *armc9* mutant **(G-I')** stained with the *zpr1* antibody marking red-green cone cell bodies (red in **F-I**) and DiO highlighting photoreceptor (PR) outer segments (OS) (green in **H-I**). Note the thinner retinal layers and the coloboma (arrows in **G** and boxed area in **H**). **(I-I')** represent the boxed area in **(H)**. Note the discontinuity of the retinal layers and the presence of a second leaflet of retina folding back, with presence of PRs and OSs in a mirror image on either side of this aberrant second retinal layer (arrows). Scale bars are 100 $\mu$ m in (B-C), 3 $\mu$ m in (D-E), 100 $\mu$ m in (F-H), 50 $\mu$ m in (I'-I'').

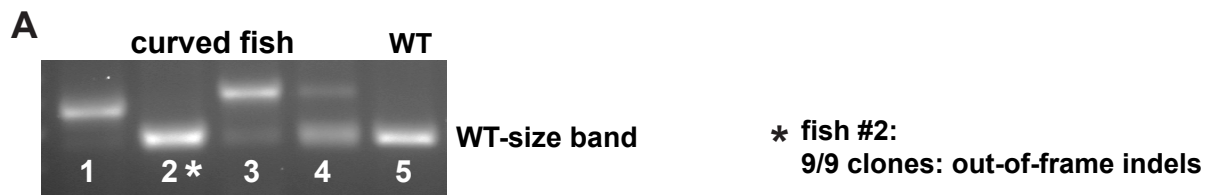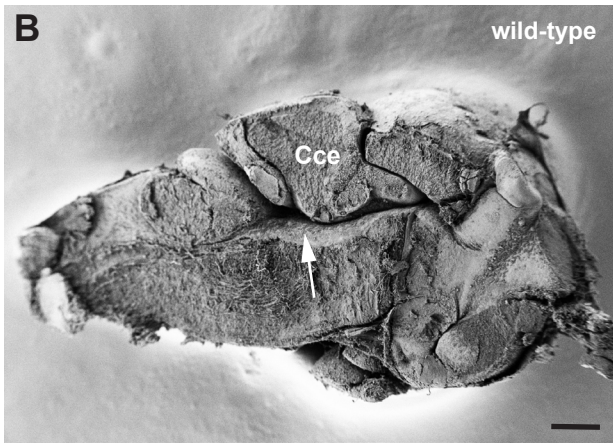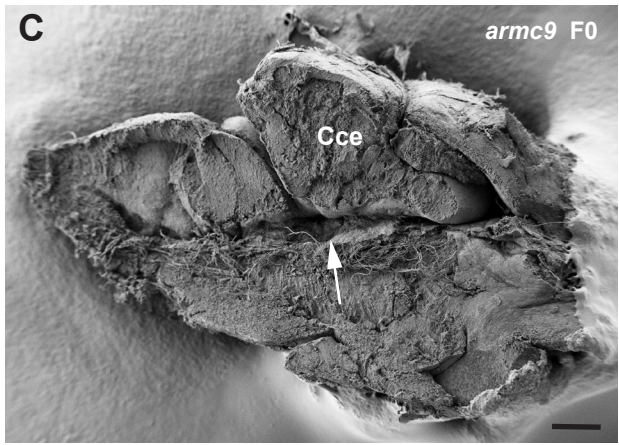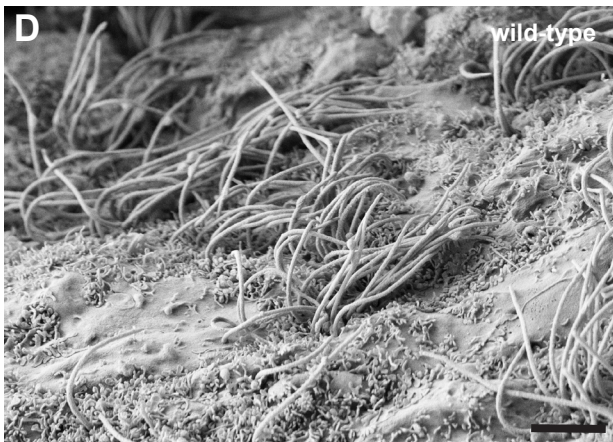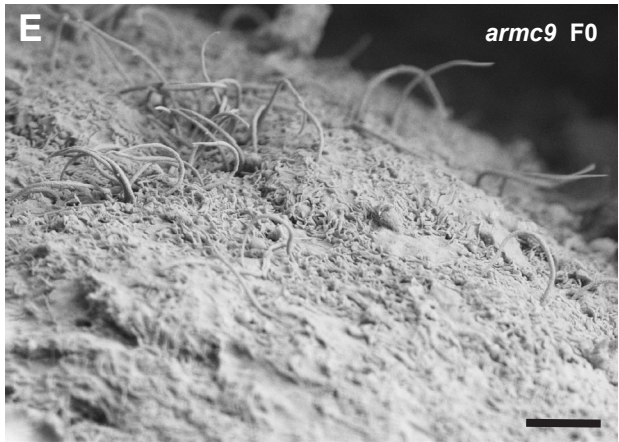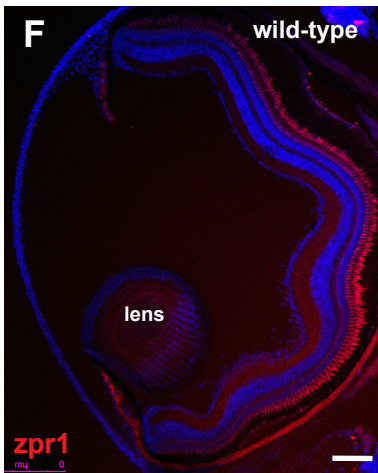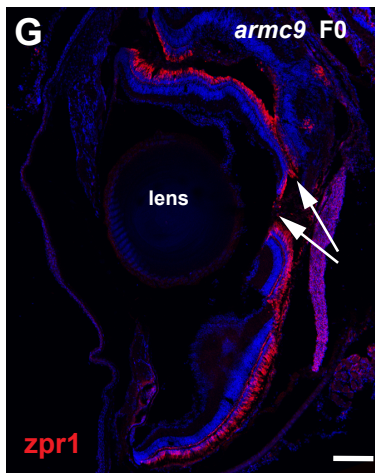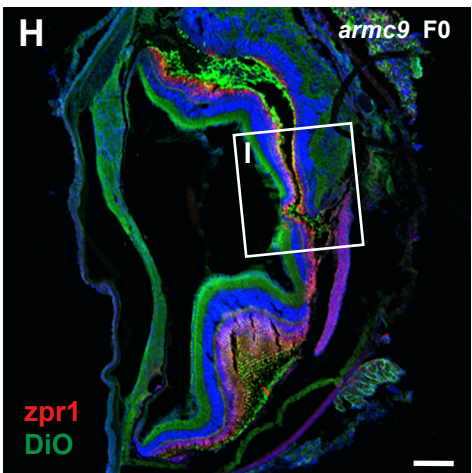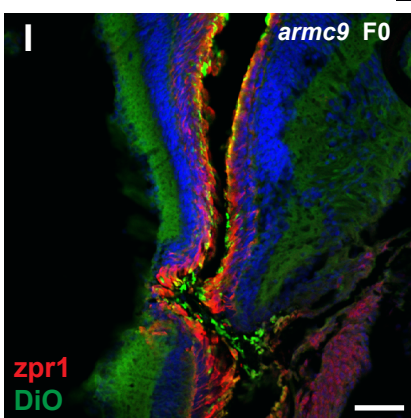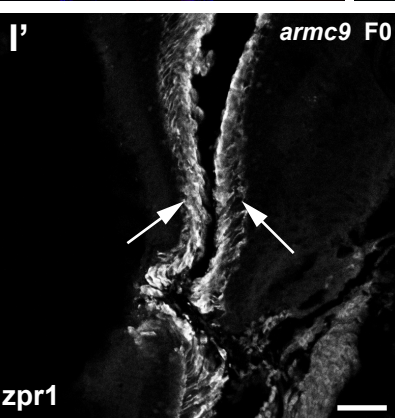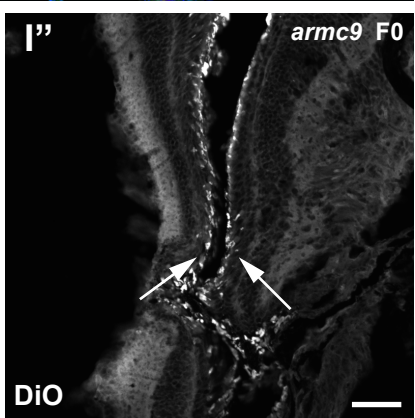

**Fig S3: ARMC9 antibody validation**

**(A)** Western blot analysis of hTERT-RPE cells transfected with non-targeting control siRNA and siARMC9. Cell lysates were probed with antibodies to ARMC9 and GAPDH as loading control.

**(B)** Quantification of western blot signal in (A) quantified via densitometry normalized to GAPDH.

**A**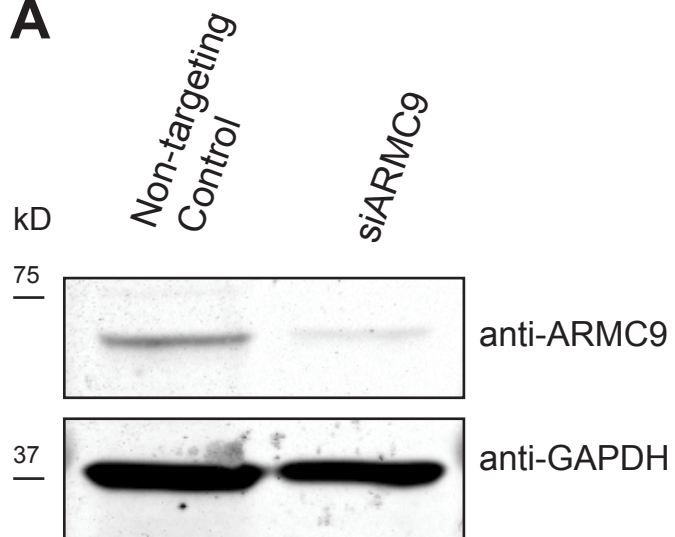**B**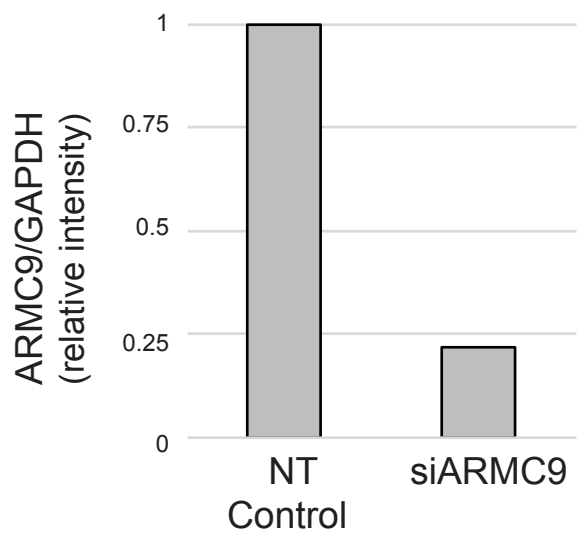

Table S1. Oligonucleotide primers for qPCR

| <b>Target Gene</b>       | <b>Primer ID</b> | <b>Sequence (5'-3')</b> |
|--------------------------|------------------|-------------------------|
| <i>ARL13B</i> Exons 2/3  | Forward:         | AATGCTGGTAAAACCGCAAC    |
|                          | Reverse:         | TTCCCCGAATTCTTATTCCA    |
| <i>ARMC9</i> Exons 21/22 | Forward:         | GGAGTGACCACCAGGGAATG    |
|                          | Reverse:         | GGCCACACGAAGAGAACAGA    |
| <i>ARMC9</i> Exons 3/4   | Forward:         | GAGACCGGACAAAGAGGAGC    |
|                          | Reverse:         | CTCTGTGGTCTGGCTCAAGG    |
| <i>ARMC9</i> Exons 2/3   | Forward:         | TTCCATCCGAGATGGGGACT    |
|                          | Reverse:         | GCTCCTCTTTGTCCGGTCTC    |
| <i>GAPDH</i> Exons 2/6   | Forward:         | AGGTGAAGGTCGGAGTCAAC    |
|                          |                  | TTCACACCCATGACGAACAT    |



**Table S2. Brain imaging findings in individuals with *ARMC9*-related Joubert syndrome**

| UW#                             | UW132-3 | UW132-4                      | UW348-3 | UW116-3                 | UW335-3 | UW335-4                 | UW349-3          | LR09-023                                                          | SA1-3 | SA2-3 | SA2-4                 |
|---------------------------------|---------|------------------------------|---------|-------------------------|---------|-------------------------|------------------|-------------------------------------------------------------------|-------|-------|-----------------------|
| Age at MRI                      | 29 yr   | 18 yr                        | 10 mo   | 6 mo                    | 2 mo    | 16 mo                   | 7 mo             | 1 mo                                                              | 14 mo | 2 yr  | 4 yr                  |
| Molar Tooth Sign                | Y       | Y                            | Y       | Y                       | Y       | Y                       | Y                | Y                                                                 | Y     | Y     | Y                     |
| Agenesis of the corpus callosum | N       | N                            | N       | N                       | N       | N                       | N                | N                                                                 | N     | N     | N                     |
| Ventriculomegaly                | N       | N                            | mild    | mild                    | N       | N                       | N                | N                                                                 | mild  | N     | N                     |
| PMG                             | N       | N                            | N       | N                       | N       | N                       | N                | N                                                                 | N     | N     | N                     |
| Heterotopia                     | N       | N                            | N       | Y                       | N       | Y                       | N                | Y                                                                 | N     | N     | N                     |
| Pituitary bright spot           | P       | P                            | P       | P                       | P       | P                       | A                | P                                                                 | A     | P     | P                     |
| Superior cb dysplasia           | Y       | Y                            | Y       | Y                       | Y       | Y                       | Y                | Y                                                                 | Y     | Y     | Y                     |
| cb hemisphere dysplasia         | N       | N                            | N       | N                       | N       | Y                       | N                | Y                                                                 | N     | Y     | N                     |
| cb atrophy                      | Y       | Y                            | N       | N                       | N       | N                       | N                | N                                                                 | N     | N     | N                     |
| cervicomedulary heterotopia     | N       | N                            | unk     | N                       | N       | N                       | Y                | possible                                                          | N     | N     | N                     |
| Foramen magnum cephalcele       | unk     | N                            | N       | N                       | N       | N                       | Y                | possible                                                          | Y     | N     | N                     |
|                                 |         | moderate-size retro-cb fluid |         | single L occipital PVNH |         | single L occipital PVNH | kinked brainstem | large posterior fossa with retro-cb fluid, single L temporal PVNH |       |       | thick corpus callosum |

A=Absent, cb=cerebellar, L=Left, mo=months, N=No, P=Present, PMG=PolyMicroGyria, PVNH=PeriVentricular Nodular Heterotopia, unk=unknown, Y=Yes, yr=years,
